# Supplementary material for: A modified screening strategy for Lynch syndrome among MLH1-deficient CRCs: Analysis from consecutive Chinese patients in a single center
Source: PubMed Central journal article supplement — Transl Oncol. 2021 Mar 3;14(5):101049. doi: 10.1016/j.tranon.2021.101049 (PMC7933804; doi:10.1016/j.tranon.2021.101049), 2021-03-03
Supplement: mmc4.pdf [file mmc4.pdf]

This document certifies that the manuscript

## **A modified screening strategy for Lynch Syndrome among MLH1-deficient CRCs: Analysis from Consecutive Chinese Patients in a Single Center**

prepared by the authors

**Wenmiao Wang, Jianming Ying, Susheng Shi, Shuangmei Zou, Lin Dong, Ning Lu,**

was edited for proper English language, grammar, punctuation, spelling, and overall style by one or more of the highly qualified native English speaking editors at AJE.

This certificate was issued on **January 19, 2021** and may be verified on the [AJE website](#) using the verification code **7105-A5C3-C692-12A9-651P**.

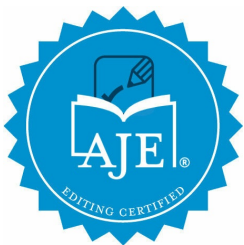

Neither the research content nor the authors' intentions were altered in any way during the editing process. Documents receiving this certification should be English-ready for publication; however, the author has the ability to accept or reject our suggestions and changes. To verify the final AJE edited version, please visit our verification page at [aje.com/certificate](#). If you have any questions or concerns about this edited document, please contact AJE at [support@aje.com](mailto:support@aje.com).
