# Supplementary figures and images for: A modified screening strategy for Lynch syndrome among MLH1-deficient CRCs: Analysis from consecutive Chinese patients in a single center
Source: PubMed Central journal article supplement — Transl Oncol. 2021 Mar 3;14(5):101049. doi: 10.1016/j.tranon.2021.101049 (PMC7933804; doi:10.1016/j.tranon.2021.101049), 2021-03-03

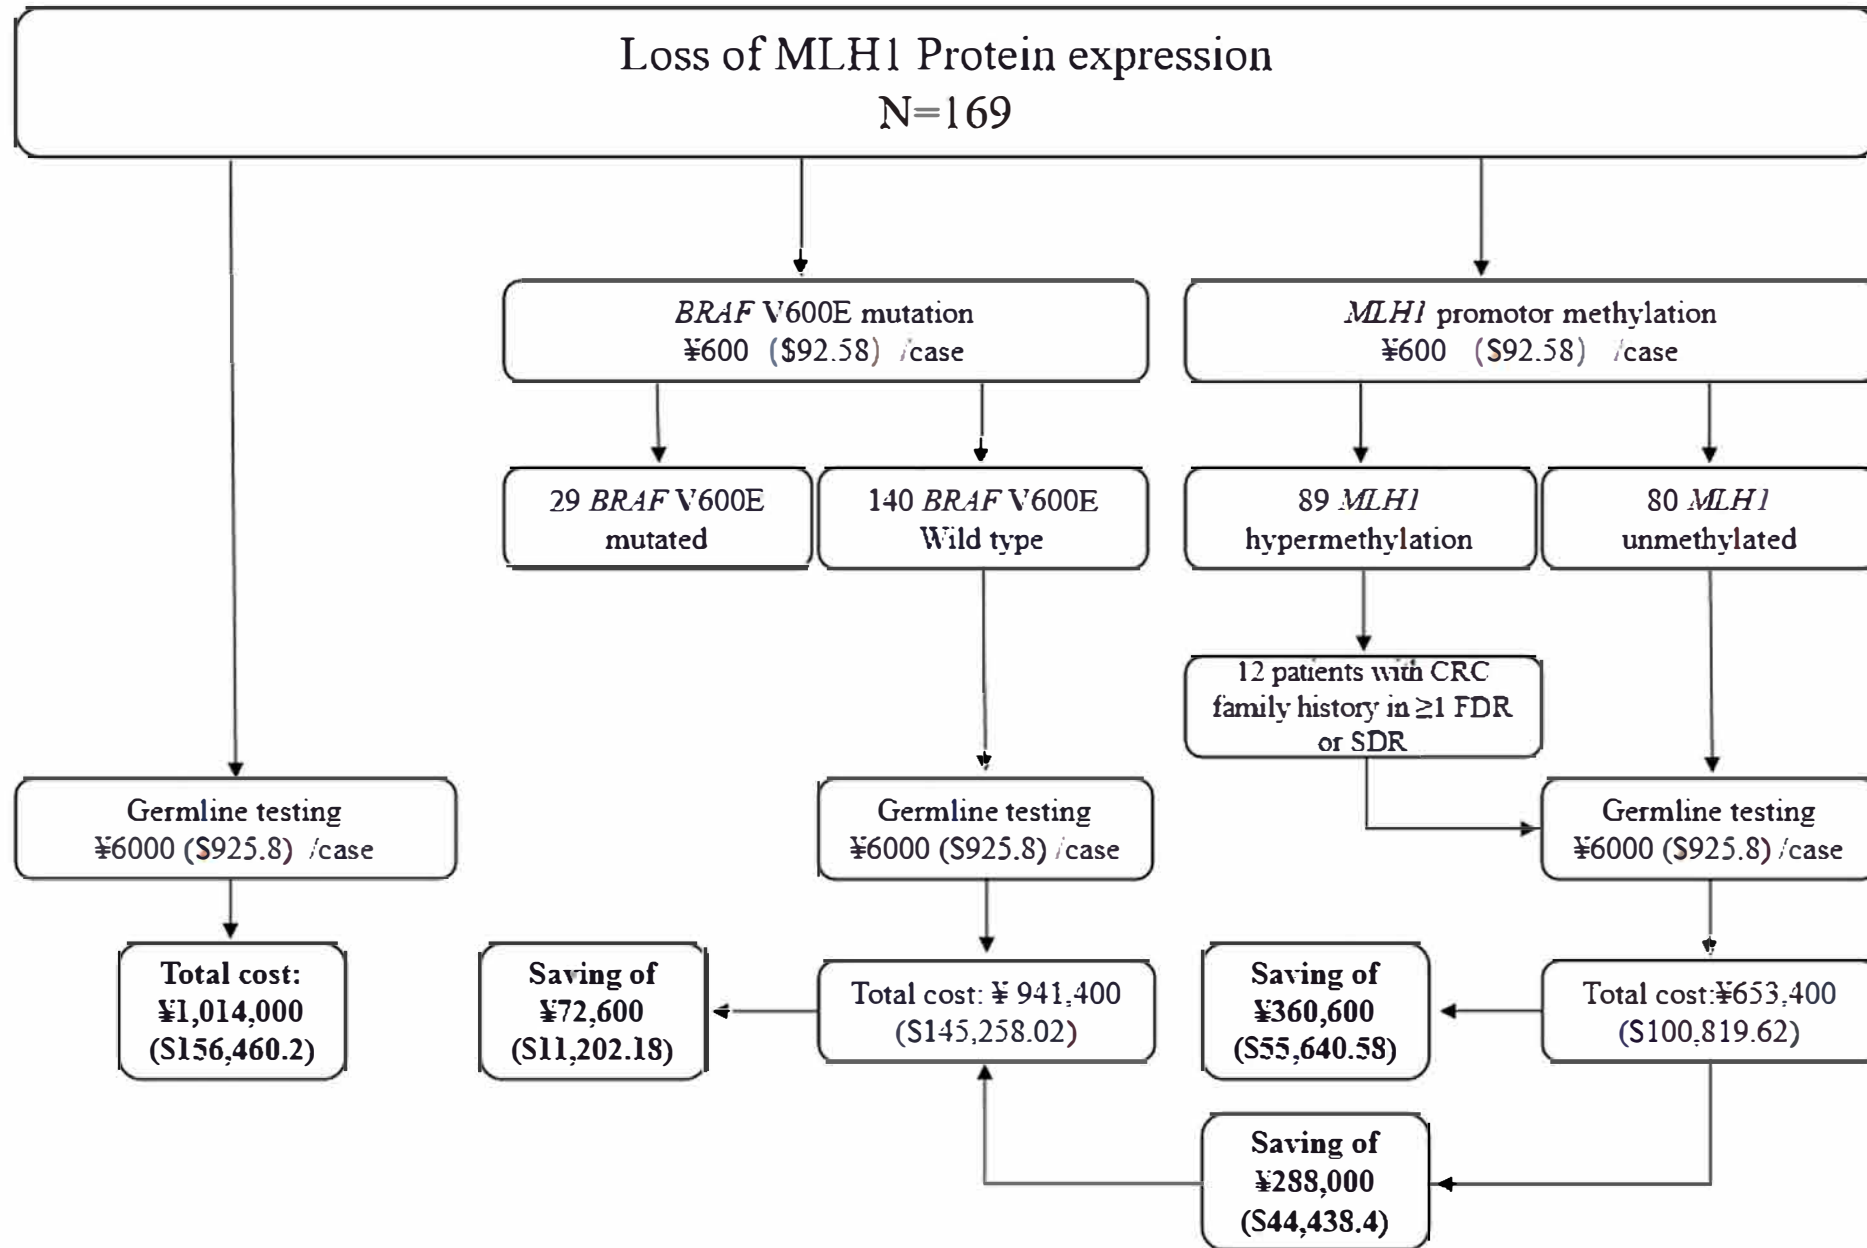

Analysis of total costs using different screening strategy for Lynch Syndrome.

Supplement: mmc3.pdf [file mmc3.pdf]
